# Supplementary material for: Prevalence of Frailty among Community-Dwelling Older Adults in Asian Countries: A Systematic Review and Meta-Analysis
Source: MDPI journal article supplement (doi:10.3390/healthcare10050895), 2022-05-12
Supplement: s1 [file s1]

### Supplementary Files

**Table S1.** The Search Strategy

**Table S2.** Study Quality Assessment (Y – Yes, N – No, U – Unclear)

**Figure S1.** Map showing the geographical distribution of all included datasets (n = 23)

**Table S3.** Characteristics of the studies included in the meta-analysis

**Table S4.** Estimates from Leave-One-Out Sensitivity Analyses for the prevalence of frailty

**Table S1.** The Search Strategy (01 January 2010 to 31 December 2020) (updated April 29, 2022)

| Database  | Search Strategy                                                                                                                                                                                                                                                                                                                                                                                                                                                                                                                                                                                                                                                                                                                                                                                                                                                                                                                                                                                                                                                                                                                                                                                                                                                                                                                                                                                                                                                                                                                                                                                                    |
|-----------|--------------------------------------------------------------------------------------------------------------------------------------------------------------------------------------------------------------------------------------------------------------------------------------------------------------------------------------------------------------------------------------------------------------------------------------------------------------------------------------------------------------------------------------------------------------------------------------------------------------------------------------------------------------------------------------------------------------------------------------------------------------------------------------------------------------------------------------------------------------------------------------------------------------------------------------------------------------------------------------------------------------------------------------------------------------------------------------------------------------------------------------------------------------------------------------------------------------------------------------------------------------------------------------------------------------------------------------------------------------------------------------------------------------------------------------------------------------------------------------------------------------------------------------------------------------------------------------------------------------------|
| Embase    | '#1 'incidence'/exp OR incidence<br>#2 (prevalence:ti,ab,kw OR incidence:ti,ab,kw OR epidemiology:ti,ab,kw) AND 'frail elderly':ti,ab,kw                                                                                                                                                                                                                                                                                                                                                                                                                                                                                                                                                                                                                                                                                                                                                                                                                                                                                                                                                                                                                                                                                                                                                                                                                                                                                                                                                                                                                                                                           |
| Cochrance | ("frailty"):ti,ab,kw AND ("prevalence"):ti,ab,kw"                                                                                                                                                                                                                                                                                                                                                                                                                                                                                                                                                                                                                                                                                                                                                                                                                                                                                                                                                                                                                                                                                                                                                                                                                                                                                                                                                                                                                                                                                                                                                                  |
| CINAHL    | MW ( prevalence or incidence or epidemiology or frequency or occurrence ) AND MW ( frailty or frail elderly or vulnerable elderly or vulnerability or functionally impaired elderly )                                                                                                                                                                                                                                                                                                                                                                                                                                                                                                                                                                                                                                                                                                                                                                                                                                                                                                                                                                                                                                                                                                                                                                                                                                                                                                                                                                                                                              |
| Ovid      | 1. Frail Elderly.sh,kf.                                                                                                                                                                                                                                                                                                                                                                                                                                                                                                                                                                                                                                                                                                                                                                                                                                                                                                                                                                                                                                                                                                                                                                                                                                                                                                                                                                                                                                                                                                                                                                                            |
| Medline   | 2. (frail* or geriatric syndrome* or geriatric disorder*).ti,ab.<br>3. ((elder* or old* or senior* or geriatric*) adj4 function* adj4 (declin* or impair*)).af.<br>4. 1 or 2 or 3<br>5. Asian Countries.sh,kf.<br>6. (Eastern Asia* or Southern Asia* or South-Eastern Asia* or Western Asia* or Central Asia*).hw,kf,ti,ab,cp.<br>7. (Eastern adj3 Asia adj3 countr*).ti,ab.<br>8. (Southern adj3 Asia adj3 countr*).ti,ab.<br>9. (South-Eastern adj3 Asia adj3 countr*).ti,ab.<br>10. (Western adj3 Asia adj3 countr*).ti,ab.<br>11. (Central adj3 Asia adj3 countr*).ti,ab.<br>12. (Mongolia* or North Korea* or South Korea* or Japan* or China or Chinese or Maldives or Bhutan* or Sri Lanka* or Nepal* or Afghanistan or Iran* or Bangladesh* or Pakistan or India* or Brunei* or East Timor or East Timur or Timor Leste or Singapore* or Lao PDR or Laos or Cambodia* or Malaysia* or Malaya or Malay or Myanmar or Myanma or Thailand or Thai or Vietnam* or Viet Nam* or Philippines or Philipines or Philippines or Philippines or Cyprus or Bahrain or Qatar or Armenia* or Georgia or Georgian or Kuwait or Palestine or Oman or Lebanon or Israel or United Arab Emirates or Azerbaijan or Jordan* or Syria or Yemen* or Saudi Arabia or Iraq* or Turkey or Turkmenistan or Kyrgyzstan* or Tajikistan or Kazakhstan or Uzbekistan).hw,kf,ti,ab,cp.<br>13. 5 or 6 or 7 or 8 or 9 or 10 or 11 or 12<br>14. Prevalence/ or prevalence.mp.<br>15. incidence.mp. or Incidence/<br>16. epidemiology.mp. or Epidemiology/<br>17. 14 or 15 or 16<br>18. 4 and 13 and 17<br>19. limit 18 to English language |

**Table S2.** Study Quality Assessment (Y – Yes, N – No, U – Unclear)

| Author                                     | Was the sample frame appropriate to address the target population? | Were study participants sampled in an appropriate way? | Was the sample size adequate? | Were the study subjects and the setting described in detail? | Was the data analysis conducted with sufficient coverage of the identified sample? | Were valid methods used for the identification of the condition? | Was the condition measured in a standard, reliable way for all participants? | Was there appropriate statistical analysis? | Was the response rate adequate, and if not, was the low response rate managed appropriately? | Total number of “Yes” |
|--------------------------------------------|--------------------------------------------------------------------|--------------------------------------------------------|-------------------------------|--------------------------------------------------------------|------------------------------------------------------------------------------------|------------------------------------------------------------------|------------------------------------------------------------------------------|---------------------------------------------|----------------------------------------------------------------------------------------------|-----------------------|
| Wu et al.                                  | Y                                                                  | Y                                                      | Y                             | Y                                                            | U                                                                                  | Y                                                                | Y                                                                            | Y                                           | Y                                                                                            | 8                     |
| Liu et al.                                 | Y                                                                  | Y                                                      | Y                             | Y                                                            | N                                                                                  | Y                                                                | Y                                                                            | Y                                           | Y                                                                                            | 8                     |
| Yu et al. (Hong Kong)                      | Y                                                                  | N                                                      | Y                             | Y                                                            | Y                                                                                  | Y                                                                | Y                                                                            | Y                                           | Y                                                                                            | 8                     |
| Yu et al. (Urban Taiwan)                   | Y                                                                  | N                                                      | Y                             | Y                                                            | Y                                                                                  | Y                                                                | Y                                                                            | Y                                           | Y                                                                                            | 8                     |
| Yu et al. (Rural Taiwan)                   | Y                                                                  | Y                                                      | Y                             | Y                                                            | Y                                                                                  | Y                                                                | Y                                                                            | Y                                           | Y                                                                                            | 9                     |
| Kendhapedi et al.<br>(Southern India)      | Y                                                                  | Y                                                      | Y                             | Y                                                            | N                                                                                  | Y                                                                | Y                                                                            | Y                                           | Y                                                                                            | 8                     |
| Kashikar & Nagarkar<br>(Western India)     | Y                                                                  | Y                                                      | Y                             | Y                                                            | N                                                                                  | Y                                                                | Y                                                                            | Y                                           | Y                                                                                            | 8                     |
| Pengpid et al.                             | Y                                                                  | Y                                                      | Y                             | Y                                                            | N                                                                                  | Y                                                                | Y                                                                            | Y                                           | Y                                                                                            | 8                     |
| Murayama et al.                            | Y                                                                  | Y                                                      | Y                             | Y                                                            | Y                                                                                  | Y                                                                | Y                                                                            | Y                                           | Y                                                                                            | 9                     |
| Boulos et al.                              | Y                                                                  | Y                                                      | Y                             | Y                                                            | N                                                                                  | Y                                                                | Y                                                                            | Y                                           | Y                                                                                            | 8                     |
| Ahmad et al.<br>(Rural Malaysia)           | Y                                                                  | Y                                                      | Y                             | Y                                                            | N                                                                                  | Y                                                                | Y                                                                            | Y                                           | Y                                                                                            | 8                     |
| Norazman et al.<br>(Urban Malaysia)        | Y                                                                  | Y                                                      | Y                             | Y                                                            | N                                                                                  | Y                                                                | Y                                                                            | Y                                           | Y                                                                                            | 8                     |
| Devkota et al.                             | Y                                                                  | N                                                      | Y                             | Y                                                            | N                                                                                  | Y                                                                | Y                                                                            | Y                                           | N                                                                                            | 5                     |
| Vaingankar et al.                          | Y                                                                  | Y                                                      | Y                             | Y                                                            | Y                                                                                  | Y                                                                | Y                                                                            | Y                                           | N                                                                                            | 8                     |
| Kang et al.                                | Y                                                                  | Y                                                      | Y                             | Y                                                            | N                                                                                  | Y                                                                | Y                                                                            | Y                                           | Y                                                                                            | 8                     |
| Siriwardhana et al.                        | Y                                                                  | Y                                                      | Y                             | Y                                                            | N                                                                                  | Y                                                                | Y                                                                            | Y                                           | Y                                                                                            | 8                     |
| Srinonprasert et al.                       | Y                                                                  | Y                                                      | Y                             | Y                                                            | N                                                                                  | Y                                                                | Y                                                                            | Y                                           | N                                                                                            | 7                     |
| Thinuan et al.<br>(Northern Thailand)      | Y                                                                  | Y                                                      | Y                             | Y                                                            | Y                                                                                  | Y                                                                | Y                                                                            | Y                                           | Y                                                                                            | 9                     |
| Chittrakul et al.<br>(Chiang Mai Province) | Y                                                                  | Y                                                      | Y                             | Y                                                            | N                                                                                  | Y                                                                | Y                                                                            | Y                                           | Y                                                                                            | 8                     |
| Akin et al.                                | Y                                                                  | Y                                                      | Y                             | Y                                                            | Y                                                                                  | Y                                                                | Y                                                                            | Y                                           | Y                                                                                            | 9                     |
| Nguyen et al.                              | Y                                                                  | Y                                                      | Y                             | Y                                                            | N                                                                                  | Y                                                                | Y                                                                            | Y                                           | Y                                                                                            | 8                     |
| Alqahtani et al                            | Y                                                                  | Y                                                      | Y                             | Y                                                            | N                                                                                  | Y                                                                | Y                                                                            | Y                                           | Y                                                                                            | 8                     |
| Delbari et al.                             | Y                                                                  | Y                                                      | Y                             | Y                                                            | N                                                                                  | Y                                                                | Y                                                                            | Y                                           | Y                                                                                            | 8                     |

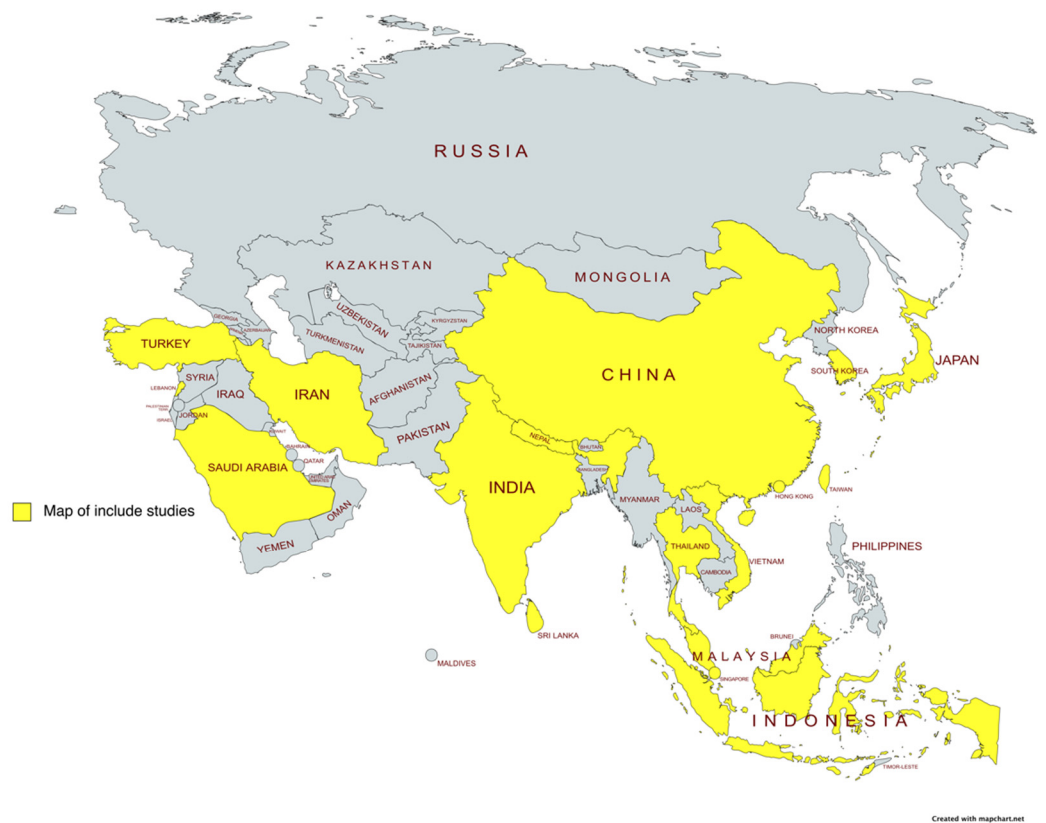

**Figure S1.** Map showing the geographical distribution of all included datasets (n = 23).  
Note. Countries that were included in the study are shown in yellow

**Table S3.** Characteristics of the studies included in the meta-analysis

| First author and year of publication | Country   | National Income Levels | Study Group/study setting/time period                                                                             | Study design                    | Sampling technique              | Frailty assessment methods | Prevalence (%), 95%CI |                  | Risk factors assessed                                                                                   | Study strengths reported by authors                                                                                                                                                                                                                                                                 | Study limitations reported by authors                                                                                                                                                                                                                                                                                                                                                                                                                                                         |
|--------------------------------------|-----------|------------------------|-------------------------------------------------------------------------------------------------------------------|---------------------------------|---------------------------------|----------------------------|-----------------------|------------------|---------------------------------------------------------------------------------------------------------|-----------------------------------------------------------------------------------------------------------------------------------------------------------------------------------------------------------------------------------------------------------------------------------------------------|-----------------------------------------------------------------------------------------------------------------------------------------------------------------------------------------------------------------------------------------------------------------------------------------------------------------------------------------------------------------------------------------------------------------------------------------------------------------------------------------------|
|                                      |           |                        |                                                                                                                   |                                 |                                 |                            | frailty               | pre frailty      |                                                                                                         |                                                                                                                                                                                                                                                                                                     |                                                                                                                                                                                                                                                                                                                                                                                                                                                                                               |
| Wu et al., 2017                      | China     | Upper middle income    | The China Health and Retirement Longitudinal Study 28 provinces in China (2011-2012)                              | Cross-sectional analysis        | Multistage probability sampling | *Fried phenotype           | 7.0 (5.9–8.1)         | 51.2 (49.3-53.3) | Age, gender, education level, living areas, comorbidities, falls, disability, and functional limitation | <ul style="list-style-type: none"> <li>- Using a widely validated frailty scale with cut-points allows screen for frailty in clinical practice.</li> <li>- Examining regional disparities in frailty prevalence.</li> <li>- Investigating the association of frailty and its biomarkers.</li> </ul> | <ul style="list-style-type: none"> <li>- The frailty prevalence was underestimated in the whole population.</li> <li>- Frailty components were only measured once.</li> <li>- Causal relationships were unable to establish between frailty status and medical conditions and disability.</li> </ul>                                                                                                                                                                                          |
| Liu et al., 2018                     | China     | Upper middle income    | The Chinese Longitudinal Healthy Longevity Survey (CLHLS), 2002, 2005, and 2008 waves of in 22 provinces in China | A population-based cohort study | Non probability sampling        | Frailty Index–44 items     | 31.9                  | 47.9             | Type of death                                                                                           | <ul style="list-style-type: none"> <li>- Using a comprehensive frailty measurement in a large-scale cohort.</li> <li>- The modification of the frailty measure demonstrated satisfactory validity.</li> <li>- The sample size is the largest in prior studies on frailty transitions.</li> </ul>    | <ul style="list-style-type: none"> <li>- The type of death consists of two domains; qualitative evaluation of the quality of death was unavailable.</li> <li>- A higher percentage of attrition may have introduced bias.</li> <li>- The short-term changes were not captured in this study using a period of three years.</li> <li>- A deficit accumulation approach may overestimate frailty transitions.</li> <li>- Using proxies to reduce nonresponse might introduce biases.</li> </ul> |
| Yu et al., 2017 (Hong Kong)          | Hong Kong | High income            | Osteoporotic Fractures in Men (MrOs) and Women (MsOs) (2001–2003)                                                 | Cross-sectional analysis        | Convenience sampling            | Frailty Index–30 items     | 16.57                 | -                | Age, gender, levels of physical activity, alcohol use, living alone.                                    | <ul style="list-style-type: none"> <li>- Using comparable measurements.</li> <li>- Using performance measures of functioning for frailty.</li> </ul>                                                                                                                                                | <ul style="list-style-type: none"> <li>- Using two different datasets with data collected at the different time points and the sampling strategies.</li> </ul>                                                                                                                                                                                                                                                                                                                                |

|                                             |           |                     |                                                           |                                       |                                                 |                           |                  |       |                                                                                                                                                                                                          |   |                                                                                                                                                                                                                                                                                                                                                                             |
|---------------------------------------------|-----------|---------------------|-----------------------------------------------------------|---------------------------------------|-------------------------------------------------|---------------------------|------------------|-------|----------------------------------------------------------------------------------------------------------------------------------------------------------------------------------------------------------|---|-----------------------------------------------------------------------------------------------------------------------------------------------------------------------------------------------------------------------------------------------------------------------------------------------------------------------------------------------------------------------------|
| Yu et al., 2017<br>(Urban Taiwan)           | Taiwan    | High income         | Taiwan Longitudinal Study on Aging (TLSA) (2003)          | Cross-sectional analysis              | A three-stage systematic random sampling method | Frailty Index–30 items    | 33.06            | -     |                                                                                                                                                                                                          |   | - The heterogeneity in frailty's definitions was used in different populations.                                                                                                                                                                                                                                                                                             |
| Yu et al., 2017<br>(Rural Taiwan)           | Taiwan    | High income         |                                                           |                                       |                                                 | Frailty Index–30 items    | 38.1             | -     |                                                                                                                                                                                                          |   |                                                                                                                                                                                                                                                                                                                                                                             |
| Kendhapedi et al., 2019<br>(Southern India) | India     | Lower middle income | Four contiguous villages, in Southern India               | Community based cross-sectional study | Census                                          | *Fried phenotype          | 27.6 (18.9-28.1) | 50.24 | Age, gender, education level, socioeconomic status, and physical activity.                                                                                                                               | – | - Lack of any validated tool for frailty screening.<br>- Cognition was not measured.<br>- Self-reported frailty screening instruments might be an imprecision.<br>- Unable to establish a causal relationship between frailty and its factors.<br>- The sample size is not big enough to do regression analyses.<br>- The results may not be generalized to other settings. |
|                                             |           |                     |                                                           |                                       |                                                 | Frailty index–40 items    | 59.2             | -     |                                                                                                                                                                                                          |   |                                                                                                                                                                                                                                                                                                                                                                             |
|                                             |           |                     |                                                           |                                       |                                                 | Tilburg Frailty Indicator | 62.6             | -     |                                                                                                                                                                                                          |   |                                                                                                                                                                                                                                                                                                                                                                             |
| Kashikar & Nagarkar, 2016 (Western India)   | India     | Lower middle income | Pune city, Maharashtra from December 2014 to January 2015 | Cross-sectional study                 | Multistage random sampling                      | *Fried phenotype          | 26.0             | 63.6  | Education level, disability, number of medicines per day, availability of support, fear of falling, not going out, falls, hospitalization, economic dependency, emotional support, and social isolation. | – | –                                                                                                                                                                                                                                                                                                                                                                           |
| Pengpid et al., 2019                        | Indonesia | lower middle income | the Indonesia Family Life                                 | Cross-sectional study                 | A multi-stage stratified                        | *Fried phenotype          | 8.14             | 61.6  | Older age, marital status, country region, poor                                                                                                                                                          | – | - The nature of the cross-sectional research.                                                                                                                                                                                                                                                                                                                               |

| Study                               |          |                      | Study design                                       |                                  | Study population                    |                                             | Prevalence    |                    | Risk factors                                                                                                             |                                                                                                                                                                                                                                                                                                            | Limitations                                                                                                                                                                                                                                                                                                                                                                                                                                 |
|-------------------------------------|----------|----------------------|----------------------------------------------------|----------------------------------|-------------------------------------|---------------------------------------------|---------------|--------------------|--------------------------------------------------------------------------------------------------------------------------|------------------------------------------------------------------------------------------------------------------------------------------------------------------------------------------------------------------------------------------------------------------------------------------------------------|---------------------------------------------------------------------------------------------------------------------------------------------------------------------------------------------------------------------------------------------------------------------------------------------------------------------------------------------------------------------------------------------------------------------------------------------|
| Author(s)                           | Country  | Socioeconomic status | Survey (IFLS-5) (2014–2015)                        | Sampling design                  | Study population                    | Study design                                | Prevalence    | Prevalence         | Study population                                                                                                         | Study population                                                                                                                                                                                                                                                                                           | Study population                                                                                                                                                                                                                                                                                                                                                                                                                            |
| Murayama et al., 2020               | Japan    | High income          | The National Survey of the Japanese Elderly (2012) | Cross-sectional analysis         | A nationally representative survey  | *Fried phenotype                            | 8.7 (7.5–9.9) | 40.8 (38.7 – 42.9) | Older groups, gender, and socioeconomic status.                                                                          | –                                                                                                                                                                                                                                                                                                          | <ul style="list-style-type: none"><li>- Excluding institutionalized elderly from surveys.</li><li>- The IPAQ is only used in populations 15–69 years old.</li><li>- The limitation of using single items in frailty definition, life satisfaction, and self-reported health status.</li><li>- Using some modifiable components with the original version of the Fried criteria.</li><li>- A low response rate in the 2012 survey.</li></ul> |
| Boulos et al., 2016                 | Lebanon  | Upper middle income  | Rural Lebanese from March 2011 to 2012             | A cross-sectional study          | Multi staged cluster sampling       | Study of Osteoporotic Fractures (SOF) index | 36.4          | 30.4               | Nutritional status, malnutrition, comorbidities, ADL independent, depressive symptoms, illiteracy, and cognitive status. | <ul style="list-style-type: none"><li>- A large sample size with a high response rate is potentially generalizable to the rural elderly population.</li><li>- The study is the first to evaluate the prevalence and associated factors.</li><li>- Using well-validated and widely used measures.</li></ul> | <ul style="list-style-type: none"><li>- Self-reporting data can be affected by memory and information bias caused by educational disparities.</li><li>- The inclusion of cognitively impaired individuals might result in underestimating the frailty status.</li><li>- Some private types of questions may be less reliable.</li><li>- Cultural adaptation is required in some items related to the MNA.</li></ul>                         |
| Ahmad et al., 2018 (Rural Malaysia) | Malaysia | Upper middle income  | Kuala Pila, Negeri Sembilan, from November 2013 to | A prospective longitudinal study | A two-stage cluster sampling method | *Fried phenotype                            | 9.4           | 57.9               | Older age, gender, number of chronic diseases, cognitive function, socioeconomic                                         | <ul style="list-style-type: none"><li>- The first study has identified various factors associated with frailty transition was conducted in rural communities.</li></ul>                                                                                                                                    | <ul style="list-style-type: none"><li>- The recruitment of well-functioning participants excluded those with cognitive and motor impairment, leading to underestimated prevalence.</li></ul>                                                                                                                                                                                                                                                |

|                                        |          |                     |                                                                            |                                                                                                              |                  |       |       |                                                                                                                                                                                                                                  |                                |                                                                                                                                                                                                                                                                                                                                                                                                                              |                                                                                                                                                                                                                                                                                                                                                                                                                                                                                                           |
|----------------------------------------|----------|---------------------|----------------------------------------------------------------------------|--------------------------------------------------------------------------------------------------------------|------------------|-------|-------|----------------------------------------------------------------------------------------------------------------------------------------------------------------------------------------------------------------------------------|--------------------------------|------------------------------------------------------------------------------------------------------------------------------------------------------------------------------------------------------------------------------------------------------------------------------------------------------------------------------------------------------------------------------------------------------------------------------|-----------------------------------------------------------------------------------------------------------------------------------------------------------------------------------------------------------------------------------------------------------------------------------------------------------------------------------------------------------------------------------------------------------------------------------------------------------------------------------------------------------|
|                                        |          |                     | February 2014 and a 12-month follow up from December 2014 to January 2015. |                                                                                                              |                  |       |       |                                                                                                                                                                                                                                  | status, and physical activity. | <ul style="list-style-type: none"><li>- A large representative sample of a population.</li><li>- The objectively measured physical frailty in grip strength and walking speed domains to increase the accuracy of the results.</li><li>- Application of multiple imputations to dealing with missing data.</li></ul>                                                                                                         | <ul style="list-style-type: none"><li>- A relatively short period of follow-up on the transition of frailty.</li><li>- Some modifiable components, such as weight loss, exhaustion, and low physical activity, may affect prevalence estimates of frailty.</li><li>- Some errors were observed in using a weight at 25 years of age to measure the weight loss.</li><li>- Lack of information about biological determinants, such as genetic factors, hormonal changes, and nutritional status.</li></ul> |
| Norazman et al., 2020 (Urban Malaysia) | Malaysia | Upper middle income | A cross-sectional study                                                    | The People Housing Project (Projek Perumahan Rakyat (PPR) at Kuala Lumpur between October 2018–January 2019. | *Fried phenotype | 15.9% | 72.8% | Age, gender, marital status, educational level, monthly household income (RM), presence of chronic diseases, functional status, cognitive status, depressive symptoms, BMI, mid-upper arm circumference, biochemical parameters. | -                              | <ul style="list-style-type: none"><li>- The observational study design is not appropriate to assess the causal relationship.</li><li>- Other confounding variables are still not unaccounted for this current study.</li><li>- The majority of participants aged 60–69 years old should not be generalized to all older adults. Thus, the association with predictors with advancing age could not be established.</li></ul> |                                                                                                                                                                                                                                                                                                                                                                                                                                                                                                           |



|                         |             |                     |                                                                                                                              |                                       |                                               |                                         |               |      |                                                                                                                                   |                                                                                                                                                                                                                                                                                                                                                                                |                                                                                                                                                                                                                                                                                                                                                                                                                     |
|-------------------------|-------------|---------------------|------------------------------------------------------------------------------------------------------------------------------|---------------------------------------|-----------------------------------------------|-----------------------------------------|---------------|------|-----------------------------------------------------------------------------------------------------------------------------------|--------------------------------------------------------------------------------------------------------------------------------------------------------------------------------------------------------------------------------------------------------------------------------------------------------------------------------------------------------------------------------|---------------------------------------------------------------------------------------------------------------------------------------------------------------------------------------------------------------------------------------------------------------------------------------------------------------------------------------------------------------------------------------------------------------------|
| Devkota et al., 2017    | Nepal       | Lower middle income | Health and Social Care Needs Assessment Survey of the Gurkha Welfare Pensioners in rural Nepal between March and April 2014. | A cross-sectional study               | The convenience sampling method               | <sup>b</sup> The Clinical Frailty Scale | 46.2          | -    | Older age, smoking, living with son, breathing problems, pain and fatigue, dental health, and history of falls and fractures.     | The study allows understanding the magnitude of comorbidity and frailty associated with aging in Nepal.                                                                                                                                                                                                                                                                        | <ul style="list-style-type: none"> <li>- Self-reporting of the medical conditions and their associated symptoms.</li> <li>- The findings might not be necessarily generalizable to other similar populations in Nepal.</li> <li>- There is potential for selection and sampling bias.</li> </ul>                                                                                                                    |
| Vaingankar et al., 2017 | Singapore   | High income         | the Well-being of the Singapore Elderly study (2013)                                                                         | A cross-sectional single-phase survey | A disproportionate stratified sampling design | *Fried phenotype                        | 5.7 (4.6–7.1) | 40.1 | Older age, social networks, having any care need, and a history of dementia, diabetes, cancer, respiratory problems or paralysis. | <ul style="list-style-type: none"> <li>- This study used a nationally representative sample that is generalizable to the population.</li> <li>- The study included additional information on psychosocial factors.</li> <li>- Using a validated and widely screening tool.</li> <li>- The inclusion of three major Asian ethnic groups: Chinese, Malay, and Indian.</li> </ul> | <ul style="list-style-type: none"> <li>- The cross-sectional studies cannot assess the cause and effect relationships.</li> <li>- Were not established the validity and reliability of a self-report instrument for frailty.</li> <li>- A low response rate and missing data on the frailty index.</li> <li>- The use of self-report tools and lack of information about health and lifestyle behaviors.</li> </ul> |
| Kang et al., 2017       | South Korea | High income         | the Korea National Health and Nutrition Examination Survey (2010 to 2012)                                                    | Cross-sectional study                 | Nationally representative samples             | Frailty index–42 items                  | 44.2          | 39.2 | Hypertension (HTN)                                                                                                                | <ul style="list-style-type: none"> <li>- This study might be easily generalizable due to recruiting nationally representative samples.</li> <li>- The results are statistical significance from multiple covariate adjustments.</li> </ul>                                                                                                                                     | <ul style="list-style-type: none"> <li>- Unable to assess the causal and temporal relationship between frailty and HTN.</li> <li>- Recall bias was reported in the study using self-reported questionnaires.</li> <li>- Lack of information about questionnaires of the type of HTN medication and the</li> </ul>                                                                                                   |

|                            |           |                     |                                                                      |                                          |                                                                      |                        |                  |      |                                                                                                                                                                                                                                                                             |                                                                                                                                                                                                                                                                                                                                                                                                                                                                               |                                                                                                                                                                                                                                                                                                           |
|----------------------------|-----------|---------------------|----------------------------------------------------------------------|------------------------------------------|----------------------------------------------------------------------|------------------------|------------------|------|-----------------------------------------------------------------------------------------------------------------------------------------------------------------------------------------------------------------------------------------------------------------------------|-------------------------------------------------------------------------------------------------------------------------------------------------------------------------------------------------------------------------------------------------------------------------------------------------------------------------------------------------------------------------------------------------------------------------------------------------------------------------------|-----------------------------------------------------------------------------------------------------------------------------------------------------------------------------------------------------------------------------------------------------------------------------------------------------------|
| Siriwardhana et al., 2019  | Sri Lanka | Lower middle income | Rural areas of Kegalle district                                      | A population-based cross-sectional study | A multistage probability sampling technique                          | *Fried phenotype       | 15.2 (12.3-18.6) | 48.5 | Age, longest-held occupation, education level                                                                                                                                                                                                                               | <ul style="list-style-type: none"> <li>- This study was a large population-based study of a regional representative sample.</li> <li>- The rigorous methodology and measures were taken.</li> <li>- Anthropometric measurements and physical fitness tests have shown excellent intra-rater reliability.</li> <li>- The response rate was extremely high.</li> <li>- Comparison of frailty distribution by income level and geographical regions in cross-country.</li> </ul> | <ul style="list-style-type: none"> <li>- number of concomitants used in KNHANES V.</li> <li>- The results are likely not generalizable.</li> <li>- Frailty prevalence might be underestimated.</li> <li>- Self-reports of physical activity and exhaustion might be influenced by recall bias.</li> </ul> |
| Srinonprasert et al., 2018 | Thailand  | Upper middle income | The fourth Thai National Health Examination Survey (NHES-IV) in 2009 | A cross-sectional survey                 | a nationally representative using a multi-stage, stratified sampling | Frailty index-30 items | 22.1             | -    | Age, gender, good overall health status, smoking, wealth index quintile, BMI, gait speed, hand grip, history of falls, impaired BADLs, impaired IADLs, depressive mood, cognitive impairment, hypertension, diabetes, stroke, chronic obstructive pulmonary disease, death. | <ul style="list-style-type: none"> <li>- The TFI followed a standardized procedure in a nationally representative, which has not been carried out in this region.</li> <li>- TFI can predict longer-term mortality and efficiently be performed in community-dwelling older people</li> </ul>                                                                                                                                                                                 | <ul style="list-style-type: none"> <li>- Inadequate data about adverse outcomes to prevent falls, ADLs, and hospitalization.</li> <li>- A self-reported functional status might not be reliable.</li> </ul>                                                                                               |

|                                               |          |                     |                                                                                         |                                          |                            |                              |      |      |                                                                                                                            |                                                                           |                                                                                                                                                                                                                                                                                                                                                                                                                  |
|-----------------------------------------------|----------|---------------------|-----------------------------------------------------------------------------------------|------------------------------------------|----------------------------|------------------------------|------|------|----------------------------------------------------------------------------------------------------------------------------|---------------------------------------------------------------------------|------------------------------------------------------------------------------------------------------------------------------------------------------------------------------------------------------------------------------------------------------------------------------------------------------------------------------------------------------------------------------------------------------------------|
| Thinuan et al., 2020 (Northern Thailand)      | Thailand | Upper middle income | Northern Thailand from September 2017 to December 2018                                  | A cross-sectional study                  | Stratified random sampling | *Fried phenotype             | 13.9 | 50.9 | Age, education level, marital status, health perception, number of comorbidities, osteoarthritis and mid-arm circumference | –                                                                         | <ul style="list-style-type: none"> <li>- Some of Fried’s criteria differ from previous studies making it challenging to compare results across studies.</li> <li>- Evaluation of unexplained weight loss by self-reported data might be less accurate.</li> <li>- Excluding mobility impaired, clinically unfit, and cognitively impaired individuals would not have reflected the actual prevalence.</li> </ul> |
| Chittrakul et al., 2020 (Chiang Mai Province) | Thailand | Upper middle income | Saraphi District of Chiang Mai Province                                                 | A cross-sectional study                  | Stratified random sampling | *Fried phenotype             | 8.7  | 76.8 | Sex, age, number of comorbidities, body mass index, fall risk                                                              | The first study assesses falls risk by separate aspects of the physiology | <ul style="list-style-type: none"> <li>- The limitations of cross-sectional designs.</li> <li>- The subgroup of frail individuals was too small.</li> <li>- Future studies should consider a prospective cohort design study to measure the fall risk and other factors associated</li> </ul>                                                                                                                    |
| Akin et al., 2015                             | Turkey   | Upper middle income | The Kayseri Elderly Health Study (KEHES), urban area from August 2013 to December 2013. | A cross-sectional population-based study | Stratified random sampling | ‡Fried phenotype FRAIL scale | 27.8 | 34.8 | Depressive mood, cognitive impairment, and malnutrition                                                                    | –                                                                         | <ul style="list-style-type: none"> <li>- Physical activity was not assessed, leads to under-or overestimating the prevalence of frailty.</li> <li>- The sample sizes of participants aged ≥85 years were relatively small.</li> <li>- Cognitive assessment was assessed neither the FFI nor the FRAIL scale.</li> </ul>                                                                                          |
| Nguyen et al., 2019                           | Vietnam  | Lower middle income | Soc Son district, northern                                                              | A cross-sectional study                  | Random sampling            | *Fried phenotype             | 21.7 | 65.6 | Health-related quality of life (HRQOL).                                                                                    | –                                                                         | <ul style="list-style-type: none"> <li>- It is challenging to derive causal relationships from the cross-sectional analysis.</li> </ul>                                                                                                                                                                                                                                                                          |

|                        |              |                     |                                                                 |                         |                                  |                  |      |      |                                                                                                |                                             |                                                                                                                                                                                                                                                                                                                                                                                                                                                                                                                                         |                                                                                                                                                                                                                                                                                                                     |
|------------------------|--------------|---------------------|-----------------------------------------------------------------|-------------------------|----------------------------------|------------------|------|------|------------------------------------------------------------------------------------------------|---------------------------------------------|-----------------------------------------------------------------------------------------------------------------------------------------------------------------------------------------------------------------------------------------------------------------------------------------------------------------------------------------------------------------------------------------------------------------------------------------------------------------------------------------------------------------------------------------|---------------------------------------------------------------------------------------------------------------------------------------------------------------------------------------------------------------------------------------------------------------------------------------------------------------------|
|                        |              |                     | Vietnam from February to April 2017                             |                         |                                  |                  |      |      |                                                                                                |                                             |                                                                                                                                                                                                                                                                                                                                                                                                                                                                                                                                         | <ul style="list-style-type: none"><li>- This study utilized a self-reported questionnaire that may potentially lead to recall bias.</li><li>- Lack of data using the EQ-5D-5L to compare with other previous studies.</li><li>- It is not easy to generalize these findings to other settings in Vietnam.</li></ul> |
| Alqahtani et al., 2021 | Saudi Arabia | High income         | the Riyadh region in Alkharj city from August 2019 to June 2020 | A cross-sectional study | Convenience sampling method      | *Fried phenotype | 21.4 | 47.3 | Gender, age, marital status, living arrangements, education level, chronic conditions, BMI     | –                                           | <ul style="list-style-type: none"><li>- Lack of generalizability for all regions of Saudi Arabia.</li><li>- There is a need to control medications.</li><li>- The cross-sectional design is the limit causality relationship.</li><li>- Self-reported outcomes may potentially lead to less accuracy of the actual associations.</li><li>- Some components of frailty were evaluated using self-reported measures, which may lead to overestimation.</li><li>- Unable to control extraneous effects from psychology symptoms.</li></ul> |                                                                                                                                                                                                                                                                                                                     |
| Delbari et al., 2021   | Iran         | Lower middle income | Five southwestern cities in Iran                                | A cross-sectional study | A proportional stratified sample | Frailty index    | 14.3 | 25.7 | Age, gender, marital status, education level, living arrangement, economic status, job status, | The study helps determine high-risk groups. | <ul style="list-style-type: none"><li>- A cross-sectional study can't establish a relationship between the outcome and predictor variables.</li><li>- The possible causes of failed convergence of regression parameters</li></ul>                                                                                                                                                                                                                                                                                                      |                                                                                                                                                                                                                                                                                                                     |

---

resulted from defining the frailty status as a binary variable.

- The study results are likely applicable to other settings if not considering patients with sarcopenia and malignancy, which investigate by assessing frailty conditions.

---

**Table S4.** Estimates from Leave-One-Out Sensitivity Analyses for the prevalence of frailty

| <b>Study Omitted</b>                          | <b>Point estimate</b> | <b>Lower CI</b> | <b>Upper CI</b> |
|-----------------------------------------------|-----------------------|-----------------|-----------------|
| Wu et al., 2017                               | 0.21                  | 0.16            | 0.27            |
| Liu et al., 2018                              | 0.20                  | 0.15            | 0.26            |
| Yu et al., 2017 (Hong Kong)                   | 0.21                  | 0.15            | 0.27            |
| Yu et al., 2017 (Urban Taiwan)                | 0.20                  | 0.15            | 0.26            |
| Yu et al., 2017 (Rural Taiwan)                | 0.20                  | 0.15            | 0.25            |
| Kendhapedi et al., 2019 (Southern India)      | 0.20                  | 0.15            | 0.26            |
| Kashikar & Nagarkar, 2016 (Western India)     | 0.20                  | 0.15            | 0.26            |
| Pengpid et al., 2019                          | 0.21                  | 0.16            | 0.26            |
| Murayama et al., 2020                         | 0.21                  | 0.16            | 0.27            |
| Boulos et al., 2016                           | 0.20                  | 0.15            | 0.25            |
| Ahmad et al., 2018 (Rural Malaysia)           | 0.21                  | 0.16            | 0.27            |
| Norazman et al., 2020 (Urban Malaysia)        | 0.21                  | 0.16            | 0.26            |
| Devkota et al., 2017                          | 0.20                  | 0.15            | 0.25            |
| Vaingankar et al., 2017                       | 0.21                  | 0.16            | 0.27            |
| Kang et al., 2017                             | 0.20                  | 0.15            | 0.25            |
| Siriwardhana et al., 2019                     | 0.21                  | 0.16            | 0.26            |
| Srinonprasert et al., 2018                    | 0.20                  | 0.15            | 0.27            |
| Thinuan et al., 2020 (Northern Thailand)      | 0.21                  | 0.16            | 0.27            |
| Chittrakul et al., 2020 (Chiang Mai Province) | 0.21                  | 0.16            | 0.27            |
| Akin et al., 2015                             | 0.20                  | 0.15            | 0.26            |
| Nguyen et al., 2019                           | 0.20                  | 0.15            | 0.26            |
| Alqahtani et al., 2021                        | 0.20                  | 0.15            | 0.26            |
| Delbari et al., 2021                          | 0.21                  | 0.16            | 0.27            |
| <b>Combined</b>                               | <b>0.21</b>           | <b>0.16</b>     | <b>0.26</b>     |
